# Supplementary material for: Evaluation of the psychometric properties of the Swiss French version of the Older People’s Quality of Life questionnaire (OPQOL-35-SF)
Source: PubMed Central journal article supplement (PMC8905913; doi:10.1186/s12955-022-01950-w), 2022-03-09
Supplement: 12955_2022_1950_MOESM1_ESM.pdf [file 12955_2022_1950_MOESM1_ESM.pdf]

# Additional material 1 : Older people's quality of life questionnaire Swiss French version used in the current study

## OPQOL-35-SF

QUESTIONNAIRE SUR LA QUALITÉ DE VIE DES PERSONNES ÂGÉES (OPQOL-35)

Nous aimerions vous interroger sur votre qualité de vie :

Aujourd'hui, en ce qui concerne votre qualité de vie :

Très mauvaise  
qualité de vie

Excellente qualité de vie

Veillez indiquer sur l'échelle ci-dessous, comment  
vous évaluez en ce moment votre qualité de vie

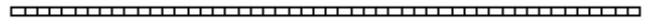

Veillez choisir une seule proposition de réponse par ligne. Il n'y a ni réponses justes ni réponses fausses. Veillez choisir la réponse qui correspond le mieux à ce que vous ressentez.

1. Considérant les aspects positifs et négatifs de votre vie, comment décririez-vous votre qualité de vie dans son ensemble ?

- Dans l'ensemble, votre qualité de vie est:
- Très bonne
  - Bonne
  - Acceptable
  - Mauvaise
  - Très mauvaise

2. Veillez indiquer le degré d'accord qui correspond au mieux à ce que vous ressentez. Choisissez une seule proposition de réponse par ligne

---

---

### La vie en général

|                                                        | Tout à fait<br>d'accord | D'accord              | Ni d'accord, ni<br>pas d'accord | Pas<br>d'accord       | Pas du tout<br>d'accord |
|--------------------------------------------------------|-------------------------|-----------------------|---------------------------------|-----------------------|-------------------------|
| (1) Dans l'ensemble, je suis<br>satisfait(e) de ma vie | <input type="radio"/>   | <input type="radio"/> | <input type="radio"/>           | <input type="radio"/> | <input type="radio"/>   |
| (2) Je suis heureux-se la plupart<br>du temps          | <input type="radio"/>   | <input type="radio"/> | <input type="radio"/>           | <input type="radio"/> | <input type="radio"/>   |
| (3) Je me réjouis de ce que la vie<br>peut m'offrir    | <input type="radio"/>   | <input type="radio"/> | <input type="radio"/>           | <input type="radio"/> | <input type="radio"/>   |
| (4) La vie me déprime                                  | <input type="radio"/>   | <input type="radio"/> | <input type="radio"/>           | <input type="radio"/> | <input type="radio"/>   |

---

---

## La santé

|                                                                     | Tout à fait d'accord | D'accord | Ni d'accord, ni pas d'accord | Pas d'accord | Pas du tout d'accord |
|---------------------------------------------------------------------|----------------------|----------|------------------------------|--------------|----------------------|
| (5) Physiquement, j'ai beaucoup d'énergie                           | 0                    | 0        | 0                            | 0            | 0                    |
| (6) La douleur affecte mon bien être                                | 0                    | 0        | 0                            | 0            | 0                    |
| (7) Mon état de santé m'empêche de m'occuper de moi ou de mon foyer | 0                    | 0        | 0                            | 0            | 0                    |
| (8) Je suis suffisamment en bonne santé pour sortir de chez moi     | 0                    | 0        | 0                            | 0            | 0                    |

---

## Relations sociales et participation à la vie sociale

|                                                                                                                                                | Tout à fait d'accord | D'accord | Ni d'accord, ni pas d'accord | Pas d'accord | Pas du tout d'accord |
|------------------------------------------------------------------------------------------------------------------------------------------------|----------------------|----------|------------------------------|--------------|----------------------|
| (9) Ma famille, mes amis ou mes voisins m'aideraient en cas de besoin                                                                          | 0                    | 0        | 0                            | 0            | 0                    |
| (10) J'aimerais plus de compagnie ou de contacts avec d'autres personnes                                                                       | 0                    | 0        | 0                            | 0            | 0                    |
| (11) J'ai quelqu'un qui me donne de l'amour et de l'affection                                                                                  | 0                    | 0        | 0                            | 0            | 0                    |
| (12) J'aimerais être plus entouré-e pour apprécier la vie                                                                                      | 0                    | 0        | 0                            | 0            | 0                    |
| (13) Mes enfants sont proches de moi, c'est important (Si pas d'enfants, proposez neveux ou nièces ou autres personnes plus jeunes et proches) | 0                    | 0        | 0                            | 0            | 0                    |
| (14) J'ai des activités sociales et des loisirs qui me plaisent                                                                                | 0                    | 0        | 0                            | 0            | 0                    |
| (15) J'essaie de continuer à être actif-ve                                                                                                     | 0                    | 0        | 0                            | 0            | 0                    |
| (16) Je poursuis des activités bénévoles ou rémunérées qui donnent un sens à ma vie                                                            | 0                    | 0        | 0                            | 0            | 0                    |

---

## Indépendance, maîtrise de sa vie et liberté

|                                                                                                      | Tout à fait d'accord | D'accord | Ni d'accord, ni pas d'accord | Pas d'accord | Pas du tout d'accord |
|------------------------------------------------------------------------------------------------------|----------------------|----------|------------------------------|--------------|----------------------|
| (17) Je suis suffisamment en bonne santé pour être indépendant-e                                     | 0                    | 0        | 0                            | 0            | 0                    |
| (18) J'éprouve du plaisir à ce que je fais                                                           | 0                    | 0        | 0                            | 0            | 0                    |
| (19) Le coût de la vie par rapport à mes revenus réduit mon niveau de vie                            | 0                    | 0        | 0                            | 0            | 0                    |
| (20) Je maîtrise bien les éléments importants de ma vie                                              | 0                    | 0        | 0                            | 0            | 0                    |
| (21) J'ai des responsabilités envers d'autres qui restreignent mes activités sociales ou mes loisirs | 0                    | 0        | 0                            | 0            | 0                    |

---

## Domicile et voisinage

|                                                                                        | Tout à fait d'accord | D'accord | Ni d'accord, ni pas d'accord | Pas d'accord | Pas du tout d'accord |
|----------------------------------------------------------------------------------------|----------------------|----------|------------------------------|--------------|----------------------|
| (22) Je me sens en sécurité où je vis                                                  | 0                    | 0        | 0                            | 0            | 0                    |
| (23) Les infrastructures, les commerces et les services locaux sont généralement bons. | 0                    | 0        | 0                            | 0            | 0                    |
| (24) J'ai du plaisir à être chez moi                                                   | 0                    | 0        | 0                            | 0            | 0                    |
| (25) Je trouve mon voisinage sympathique                                               | 0                    | 0        | 0                            | 0            | 0                    |

---

## Le bien-être psychologique et émotionnel

|                                                                                                                                | Tout à fait d'accord | D'accord | Ni d'accord, ni pas d'accord | Pas d'accord | Pas du tout d'accord |
|--------------------------------------------------------------------------------------------------------------------------------|----------------------|----------|------------------------------|--------------|----------------------|
| (26) Je prends la vie comme elle vient et je fais au mieux                                                                     | 0                    | 0        | 0                            | 0            | 0                    |
| (27) Je me sens chanceux-se par rapport à la plupart des gens                                                                  | 0                    | 0        | 0                            | 0            | 0                    |
| (28) En général, je vois plutôt le bon côté des choses                                                                         | 0                    | 0        | 0                            | 0            | 0                    |
| (29) Si mon état de santé devait limiter mes activités sociales et mes loisirs, je compenserais en trouvant d'autres activités | 0                    | 0        | 0                            | 0            | 0                    |

---

### Situation financière

|                                                                                  | Tout à fait d'accord | D'accord | Ni d'accord, ni pas d'accord | Pas d'accord | Pas du tout d'accord |
|----------------------------------------------------------------------------------|----------------------|----------|------------------------------|--------------|----------------------|
| (30) J'ai assez d'argent pour payer les factures du ménage                       | 0                    | 0        | 0                            | 0            | 0                    |
| (31) J'ai assez d'argent pour payer l'entretien de mon logement ou de mon ménage | 0                    | 0        | 0                            | 0            | 0                    |
| (32) J'ai l'argent nécessaire pour acheter ce dont j'ai envie                    | 0                    | 0        | 0                            | 0            | 0                    |
| (33) Je n'ai pas l'argent nécessaire pour faire ce qui me plairait               | 0                    | 0        | 0                            | 0            | 0                    |

---

### Culture et religion

|                                                                                            | Tout à fait d'accord | D'accord | Ni d'accord, ni pas d'accord | Pas d'accord | Pas du tout d'accord |
|--------------------------------------------------------------------------------------------|----------------------|----------|------------------------------|--------------|----------------------|
| (34) La religion, la foi ou la philosophie sont importantes pour ma qualité de vie         | 0                    | 0        | 0                            | 0            | 0                    |
| (35) Assister à des évènements religieux ou culturels est important pour ma qualité de vie | 0                    | 0        | 0                            | 0            | 0                    |
