# Supplementary material for: Evaluation of the psychometric properties of the Swiss French version of the Older People’s Quality of Life questionnaire (OPQOL-35-SF)
Source: PubMed Central journal article supplement (PMC8905913; doi:10.1186/s12955-022-01950-w), 2022-03-09
Supplement: 12955_2022_1950_MOESM2_ESM.pdf [file 12955_2022_1950_MOESM2_ESM.pdf]

## Additional material 2: Score conversions

|                                | OPQOL-35                   | VAS QoL/VAS Health | WHOQOL-OLD | CASP-12  | EQ-5D-5L |             |
|--------------------------------|----------------------------|--------------------|------------|----------|----------|-------------|
| <b>Original Questionnaires</b> | <i>Number of items</i>     | 35                 | -          | 24       | 12       | 5           |
|                                | <i>Scoring</i>             | 1-5                | -          | 1-5      | 0-3      | Algorithme  |
|                                | <i>Minimum total score</i> | 35                 | 0          | 24       | 0        | -0.53       |
|                                | <i>Maximum total score</i> | 175                | 100        | 120      | 36       | 1           |
| <b>Range</b>                   | 140                        | 100                | 96         | 36       | 1.53     |             |
| <b>Verification</b>            | <i>Coefficient</i>         | -                  | 1.4        | 1.458333 | 3.88889  | 91.503268   |
|                                | <i>Conversion</i>          |                    | +35        |          | +35      | +0.53 / +35 |
|                                | <i>Minimum total score</i> | 35                 | 35         | 35       | 35       | 35          |
|                                | <i>Maximum total score</i> | 175                | 175        | 175      | 175      | 175         |

*OPQOL-35: Older People's Quality of Live Questionnaire; VAS QoL: Visual Analogue Scale for Quality of Live; VAS health: Visual Analogue Scale for health; WHOQOL-OLD: World Health Organization Quality of Life in older people questionnaire; CASP-12: Control, Autonomy, Self-realization, Pleasure in 12 questions; EQ-5D-5L: EuroQol-5-dimensions-5- levels.*
