# Supplementary material for: Evaluation of the psychometric properties of the Swiss French version of the Older People’s Quality of Life questionnaire (OPQOL-35-SF)
Source: PubMed Central journal article supplement (PMC8905913; doi:10.1186/s12955-022-01950-w), 2022-03-09
Supplement: 12955_2022_1950_MOESM3_ESM.pdf [file 12955_2022_1950_MOESM3_ESM.pdf]

### Additional material 3: Principal Component Analysis (test)

|                             |                                                                                                        | Principal Component Analysis test (n= 264) |      |      |      |      |       |      |      |
|-----------------------------|--------------------------------------------------------------------------------------------------------|--------------------------------------------|------|------|------|------|-------|------|------|
| Question's number and items |                                                                                                        | RC1                                        | RC2  | RC3  | RC4  | RC5  | RC6   | RC7  | RC8  |
| 1                           | I enjoy my life overall                                                                                | 0.70                                       |      |      |      |      |       |      |      |
| 2                           | I am happy much of the time                                                                            | 0.77                                       |      |      |      |      |       |      |      |
| 3                           | I look forward to things                                                                               | 0.72                                       |      |      |      |      |       |      |      |
| 4                           | Life gets me down                                                                                      | 0.63                                       |      |      |      |      |       |      |      |
| 5                           | I have a lot of physical energy                                                                        |                                            |      | 0.61 |      |      |       |      |      |
| 6                           | Pain affects my well-being                                                                             |                                            |      | 0.39 |      |      | -0.44 |      |      |
| 7                           | My health restricts me looking after myself or my home                                                 |                                            |      | 0.55 |      |      |       | 0.30 |      |
| 8                           | I am healthy enough to get out and about                                                               |                                            |      |      |      |      |       | 0.52 | 0.38 |
| 9                           | My family, friends or neighbours would help me if needed                                               |                                            |      |      |      |      |       |      | 0.57 |
| 10                          | I would like more companionship or contact with other people                                           |                                            |      |      | 0.78 |      |       |      |      |
| 11                          | I have someone who gives me love and affection                                                         | 0.31                                       |      |      |      | 0.32 |       |      | 0.38 |
| 12                          | I'd like more people to enjoy life with                                                                |                                            |      |      | 0.75 |      |       |      |      |
| 13                          | I have my children around which is important                                                           |                                            |      |      |      |      |       |      | 0.70 |
| 14                          | I have social or leisure activities/hobbies that I enjoy doing                                         |                                            |      | 0.61 |      |      | 0.34  |      |      |
| 15                          | I try to stay involved with things                                                                     |                                            |      | 0.73 |      |      |       |      |      |
| 16                          | I do paid or unpaid work or activities that give me a role in life                                     |                                            |      | 0.70 |      |      |       |      |      |
| 17                          | I am healthy enough to have my independence                                                            |                                            |      | 0.62 |      |      |       | 0.35 |      |
| 18                          | I can please myself what I do                                                                          | 0.51                                       |      | 0.43 |      |      | 0.35  |      |      |
| 19                          | The cost of things compared to my pension/income restricts my life                                     |                                            | 0.72 |      |      |      |       |      |      |
| 20                          | I have a lot of control over the important things in my life                                           | 0.50                                       |      | 0.38 |      |      |       |      |      |
| 21                          | I have responsibilities to others that restrict my social or leisure activities                        |                                            |      |      | 0.61 |      |       |      |      |
| 22                          | I feel safe where I live                                                                               |                                            |      |      |      |      |       | 0.67 |      |
| 23                          | The local shops, services and facilities are good overall                                              |                                            |      |      |      |      | 0.60  |      |      |
| 24                          | I get pleasure from my home                                                                            | 0.32                                       |      |      |      |      | 0.31  | 0.64 |      |
| 25                          | I find my neighbourhood friendly                                                                       |                                            |      |      |      |      | 0.36  |      |      |
| 26                          | I take life as it comes and make the best of things                                                    | 0.59                                       |      |      |      |      | 0.32  |      |      |
| 27                          | I feel lucky compared to most people                                                                   | 0.36                                       |      |      |      |      | 0.47  |      |      |
| 28                          | I tend to look on the bright side                                                                      | 0.61                                       |      |      |      |      | 0.44  |      |      |
| 29                          | If my health limits social/leisure activities, then I will compensate and find something else I can do |                                            |      | 0.52 |      |      |       |      |      |
| 30                          | I have enough money to pay for household bills                                                         |                                            | 0.73 |      |      |      |       |      |      |
| 31                          | I have enough money to pay for household repairs or help needed in the house                           |                                            | 0.75 |      |      |      |       |      |      |
| 32                          | I can afford to buy what I want to                                                                     |                                            | 0.75 |      |      |      |       |      |      |
| 33                          | I cannot afford to do things I would enjoy                                                             |                                            | 0.69 |      |      |      |       |      |      |
| 34                          | Religion, belief or philosophy is important to my quality of life                                      |                                            |      |      |      | 0.89 |       |      |      |
| 35                          | Cultural/religious events/festivals are important to my quality of life                                |                                            |      |      |      | 0.89 |       |      |      |
| Explained Proportion        |                                                                                                        | 0.21                                       | 0.15 | 0.18 | 0.10 | 0.09 | 0.10  | 0.09 | 0.08 |
