# Supplementary material for: Evaluation of the psychometric properties of the Swiss French version of the Older People’s Quality of Life questionnaire (OPQOL-35-SF)
Source: PubMed Central journal article supplement (PMC8905913; doi:10.1186/s12955-022-01950-w), 2022-03-09
Supplement: 12955_2022_1950_MOESM4_ESM.pdf [file 12955_2022_1950_MOESM4_ESM.pdf]

## Additional material 4: Principal Component Analysis (retest)

| Principal Component Analysis retest (n= 238)                                                              |      |      |      |       |      |      |      |      |
|-----------------------------------------------------------------------------------------------------------|------|------|------|-------|------|------|------|------|
| Question's number and items                                                                               | rRC1 | rRC2 | rRC3 | rRC4  | rRC5 | rRC6 | rRC7 | rRC8 |
| 1 I enjoy my life overall                                                                                 |      |      |      |       |      |      |      | 0.72 |
| 2 I am happy much of the time                                                                             |      |      |      |       |      |      |      | 0.76 |
| 3 I look forward to things                                                                                |      |      |      |       | 0.31 |      |      | 0.69 |
| 4 Life gets me down                                                                                       |      |      |      |       |      |      |      | 0.61 |
| 5 I have a lot of physical energy                                                                         |      |      |      |       | 0.58 |      |      |      |
| 6 Pain affects my well-being                                                                              |      |      |      | 0.56  | 0.43 |      |      |      |
| 7 My health restricts me looking after myself or my home                                                  |      |      |      |       | 0.67 |      |      |      |
| 8 I am healthy enough to get out and about                                                                |      |      |      |       | 0.56 |      |      |      |
| 9 My family, friends or neighbours would help me if needed                                                | 0.42 |      |      |       |      | 0.48 |      |      |
| 10 I would like more companionship or contact with other people                                           |      |      |      |       |      |      | 0.83 |      |
| 11 I have someone who gives me love and affection                                                         |      |      |      |       |      | 0.55 |      | 0.39 |
| 12 I'd like more people to enjoy life with                                                                |      |      |      |       |      |      | 0.75 |      |
| 13 I have my children around which is important                                                           |      |      |      |       |      | 0.74 |      |      |
| 14 I have social or leisure activities/hobbies that I enjoy doing                                         | 0.59 |      |      |       | 0.40 |      |      |      |
| 15 I try to stay involved with things                                                                     | 0.59 |      |      |       | 0.41 |      |      |      |
| 16 I do paid or unpaid work or activities that give me a role in life                                     |      |      |      |       | 0.45 |      |      |      |
| 17 I am healthy enough to have my independence                                                            | 0.32 |      |      |       | 0.73 |      |      |      |
| 18 I can please myself what I do                                                                          | 0.55 |      |      |       | 0.47 |      |      |      |
| 19 The cost of things compared to my pension/income restricts my life                                     |      | 0.78 |      |       |      |      |      |      |
| 20 I have a lot of control over the important things in my life                                           | 0.44 |      |      |       | 0.48 |      |      |      |
| 21 I have responsibilities to others that restrict my social or leisure activities                        |      |      |      | -0.47 |      |      | 0.36 | 0.30 |
| 22 I feel safe where I live                                                                               | 0.38 |      |      | -0.37 | 0.35 | 0.35 |      |      |
| 23 The local shops, services and facilities are good overall                                              | 0.63 |      |      |       |      |      |      |      |
| 24 I get pleasure from my home                                                                            | 0.39 |      |      |       |      | 0.43 |      |      |
| 25 I find my neighbourhood friendly                                                                       | 0.36 |      |      |       |      | 0.63 |      |      |
| 26 I take life as it comes and make the best of things                                                    | 0.51 |      |      |       |      |      |      | 0.32 |
| 27 I feel lucky compared to most people                                                                   | 0.52 |      |      |       |      |      |      |      |
| 28 I tend to look on the bright side                                                                      | 0.59 |      |      |       |      |      |      | 0.37 |
| 29 If my health limits social/leisure activities, then I will compensate and find something else I can do | 0.55 |      |      | 0.34  |      |      |      |      |
| 30 I have enough money to pay for household bills                                                         |      | 0.72 |      |       | 0.32 |      |      |      |
| 31 I have enough money to pay for household repairs or help needed in the house                           |      | 0.71 |      |       |      |      |      |      |
| 32 I cannot afford to do things I would enjoy                                                             |      | 0.80 |      |       |      |      |      |      |
| 33 I cannot afford to do things I would enjoy                                                             |      | 0.74 |      |       |      |      |      |      |
| 34 Religion, belief or philosophy is important to my quality of life                                      |      |      | 0.89 |       |      |      |      |      |
| 35 Cultural/religious events/festivals are important to my quality of life                                |      |      | 0.89 |       |      |      |      |      |
| Explained Proportion                                                                                      | 0.19 | 0.16 | 0.10 | 0.06  | 0.16 | 0.11 | 0.09 | 0.19 |
