# Supplementary material for: Evaluation of the psychometric properties of the Swiss French version of the Older People’s Quality of Life questionnaire (OPQOL-35-SF)
Source: PubMed Central journal article supplement (PMC8905913; doi:10.1186/s12955-022-01950-w), 2022-03-09
Supplement: 12955_2022_1950_MOESM6_ESM.pdf [file 12955_2022_1950_MOESM6_ESM.pdf]

**Additional material 6: Cohen's kappa and prevalence-adjusted bias-adjusted kappa (PABAK)**

| Item | Full sample (n= 262) |                              |                   | Participant without extra events (n=238) |                              |                   |
|------|----------------------|------------------------------|-------------------|------------------------------------------|------------------------------|-------------------|
|      | AG. (%)              | Kappa (weighted)<br>(95% CI) | PABAK<br>(95% CI) | AG. (%)                                  | Kappa (weighted)<br>(95% CI) | PABAK<br>(95% CI) |
| 1    | 91.8                 | 0.49 (0.39-0.58)             | 0.84 (0.79-0.88)  | 92.1                                     | 0.5 (0.39-0.59)              | 0.84 (0.81-0.88)  |
| 2    | 90.6                 | 0.44 (0.34-0.54)             | 0.81 (0.76-0.86)  | 90.4                                     | 0.43 (0.33-0.53)             | 0.81 (0.77-0.86)  |
| 3    | 87.5                 | 0.44 (0.34-0.53)             | 0.75 (0.7-0.79)   | 87.5                                     | 0.42 (0.33-0.52)             | 0.75 (0.7-0.8)    |
| 4    | 87.4                 | 0.37 (0.28-0.46)             | 0.75 (0.69-0.8)   | 87.7                                     | 0.36 (0.25-0.46)             | 0.75 (0.69-0.81)  |
| 5    | 88.5                 | 0.47 (0.39-0.55)             | 0.77 (0.7-0.81)   | 88.4                                     | 0.46 (0.37-0.55)             | 0.77 (0.69-0.81)  |
| 6    | 83.2                 | 0.48 (0.41-0.55)             | 0.66 (0.62-0.71)  | 83.2                                     | 0.48 (0.4-0.56)              | 0.66 (0.61-0.71)  |
| 7    | 86.5                 | 0.41 (0.31-0.5)              | 0.73 (0.69-0.78)  | 87.4                                     | 0.43 (0.33-0.52)             | 0.75 (0.69-0.79)  |
| 8    | 88.5                 | 0.25 (0.14-0.35)             | 0.77 (0.71-0.83)  | 87.8                                     | 0.22 (0.12-0.34)             | 0.76 (0.69-0.81)  |
| 9    | 90.7                 | 0.44 (0.33-0.54)             | 0.81 (0.75-0.85)  | 90.4                                     | 0.43 (0.33-0.53)             | 0.81 (0.76-0.86)  |
| 10   | 84.9                 | 0.51 (0.41-0.58)             | 0.7 (0.65-0.75)   | 84.9                                     | 0.51 (0.41-0.59)             | 0.7 (0.64-0.75)   |
| 11   | 89.3                 | 0.44 (0.35-0.53)             | 0.79 (0.74-0.83)  | 89.4                                     | 0.44 (0.34-0.54)             | 0.79 (0.74-0.83)  |
| 12   | 83.6                 | 0.49 (0.4-0.57)              | 0.67 (0.62-0.72)  | 83.5                                     | 0.49 (0.4-0.58)              | 0.67 (0.62-0.72)  |
| 13   | 92.6                 | 0.58 (0.47-0.68)             | 0.85 (0.81-0.89)  | 93.3                                     | 0.62 (0.51-0.71)             | 0.87 (0.82-0.9)   |
| 14   | 91.6                 | 0.5 (0.41-0.6)               | 0.83 (0.78-0.87)  | 91.7                                     | 0.48 (0.39-0.58)             | 0.83 (0.79-0.9)   |
| 15   | 92.6                 | 0.49 (0.4-0.58)              | 0.85 (0.81-0.89)  | 93                                       | 0.52 (0.42-0.62)             | 0.86 (0.82-0.9)   |
| 16   | 83.5                 | 0.58 (0.5-0.65)              | 0.67 (0.61-0.72)  | 83.1                                     | 0.56 (0.47-0.63)             | 0.66 (0.61-0.72)  |
| 17   | 92.2                 | 0.49 (0.38-0.6)              | 0.84 (0.79-0.87)  | 92                                       | 0.49 (0.38-0.6)              | 0.84 (0.79-0.88)  |
| 18   | 92.5                 | 0.47 (0.36-0.57)             | 0.85 (0.76-0.89)  | 92.5                                     | 0.46 (0.36-0.57)             | 0.85 (0.79-0.89)  |
| 19   | 81.6                 | 0.48 (0.39-0.57)             | 0.63 (0.56-0.69)  | 81.6                                     | 0.48 (0.39-0.57)             | 0.63 (0.57-0.69)  |
| 20   | 88.5                 | 0.39 (0.28-0.48)             | 0.77 (0.71-0.81)  | 89.1                                     | 0.41 (0.32-0.52)             | 0.78 (0.71-0.82)  |
| 21   | 83                   | 0.4 (0.32-0.49)              | 0.66 (0.61-0.71)  | 82.7                                     | 0.4 (0.31-0.5)               | 0.65 (0.6-0.71)   |
| 22   | 92.7                 | 0.47 (0.35-0.6)              | 0.85 (0.79-0.9)   | 92.6                                     | 0.46 (0.32-0.6)              | 0.85 (0.77-0.9)   |
| 23   | 90.6                 | 0.58 (0.5-0.66)              | 0.81 (0.77-0.85)  | 90.7                                     | 0.58 (0.49-0.67)             | 0.81 (0.77-0.85)  |
| 24   | 90.1                 | 0.47 (0.36-0.6)              | 0.8 (0.61-0.85)   | 89.9                                     | 0.45 (0.31-0.56)             | 0.8 (0.59-0.87)   |
| 25   | 91.9                 | 0.54 (0.45-0.62)             | 0.84 (0.78-0.88)  | 92.1                                     | 0.56 (0.48-0.65)             | 0.84 (0.8-0.89)   |
| 26   | 88.2                 | 0.38 (0.28-0.48)             | 0.76 (0.68-0.81)  | 88.4                                     | 0.37 (0.25-0.48)             | 0.77 (0.66-0.81)  |
| 27   | 90.9                 | 0.44 (0.34-0.53)             | 0.82 (0.75-0.87)  | 91.3                                     | 0.45 (0.35-0.55)             | 0.83 (0.77-0.88)  |
| 28   | 90.6                 | 0.47 (0.37-0.56)             | 0.81 (0.76-0.85)  | 90.4                                     | 0.45 (0.34-0.55)             | 0.81 (0.76-0.85)  |
| 29   | 87.3                 | 0.44 (0.36-0.52)             | 0.75 (0.7-0.78)   | 87.2                                     | 0.43 (0.34-0.51)             | 0.74 (0.7-0.79)   |
| 30   | 92.3                 | 0.53 (0.43-0.62)             | 0.85 (0.8-0.89)   | 91.6                                     | 0.5 (0.39-0.59)              | 0.83 (0.78-0.87)  |
| 31   | 92.2                 | 0.52 (0.43-0.61)             | 0.84 (0.79-0.89)  | 91.6                                     | 0.49 (0.4-0.59)              | 0.83 (0.77-0.87)  |
| 32   | 88.4                 | 0.56 (0.47-0.63)             | 0.77 (0.73-0.81)  | 88.2                                     | 0.56 (0.47-0.63)             | 0.76 (0.72-0.8)   |
| 33   | 83.1                 | 0.46 (0.38-0.54)             | 0.66 (0.6-0.71)   | 83.4                                     | 0.47 (0.38-0.56)             | 0.67 (0.61-0.72)  |
| 34   | 91.9                 | 0.7 (0.63-0.75)              | 0.84 (0.81-0.87)  | 91.4                                     | 0.67 (0.6-0.73)              | 0.83 (0.79-0.86)  |
| 35   | 88.5                 | 0.58 (0.51-0.65)             | 0.77 (0.73-0.8)   | 88.2                                     | 0.56 (0.49-0.63)             | 0.76 (0.72-0.8)   |

AG. (%): Agreement in percent; CI: Confidence Interval; PABAK: Prevalence-Adjusted Bias-Adjusted Kappa
