# Supplementary material for: Evaluation of the psychometric properties of the Swiss French version of the Older People’s Quality of Life questionnaire (OPQOL-35-SF)
Source: Health Qual Life Outcomes. 2022 Mar 9;20:43. doi: 10.1186/s12955-022-01950-w (PMC8905913; doi:10.1186/s12955-022-01950-w)
Supplement: Supplementary file 5 — Additional file 5. Final Version of Older People Quality of Life Questionnaire 35 Swiss French translation (OPQOL-35-SF). OPQOL-35-SF resulting from the study [file 12955_2022_1950_MOESM5_ESM.pdf]

## Additional material 5 : Final version Older People's Quality of Life Questionnaire (OPQOL-35-SF)

### Older People's Quality of Life Questionnaire (OPQOL-35-SF)

#### QUESTIONNAIRE SUR LA QUALITÉ DE VIE DES PERSONNES ÂGÉES (OPQOL-35-SF)

Nous aimerions vous interroger sur votre qualité de vie :

Aujourd'hui, en ce qui concerne votre qualité de vie :

Veuillez indiquer sur l'échelle ci-dessous, comment vous évaluez en ce moment votre qualité de vie

Très mauvaise  
qualité de vie

Excellente qualité de vie

-----

Veuillez choisir une seule proposition de réponse par ligne. Il n'y a ni réponses justes ni réponses fausses. Veuillez choisir la réponse qui correspond le mieux à ce que vous ressentez.

1. Considérant les aspects positifs et négatifs de votre vie, comment décririez-vous votre qualité de vie dans son ensemble ?

Dans l'ensemble, votre qualité de vie est:

- ☐ Très bonne
- ☐ Bonne
- ☐ Acceptable
- ☐ Mauvaise
- ☐ Très mauvaise

2. Veuillez indiquer le degré d'accord qui correspond au mieux à ce que vous ressentez. Choisissez une seule proposition de réponse par ligne

---

---

**Bien-être psychologique et émotionnel**

|                                                              | Tout à fait d'accord  | D'accord              | Ni d'accord, ni pas d'accord | Pas d'accord          | Pas du tout d'accord  |
|--------------------------------------------------------------|-----------------------|-----------------------|------------------------------|-----------------------|-----------------------|
| (1) Dans l'ensemble, je suis satisfait(e) de ma vie          | <input type="radio"/> | <input type="radio"/> | <input type="radio"/>        | <input type="radio"/> | <input type="radio"/> |
| (2) Je suis heureux-se la plupart du temps                   | <input type="radio"/> | <input type="radio"/> | <input type="radio"/>        | <input type="radio"/> | <input type="radio"/> |
| (3) Je me réjouis de ce que la vie peut m'offrir             | <input type="radio"/> | <input type="radio"/> | <input type="radio"/>        | <input type="radio"/> | <input type="radio"/> |
| (4) La vie me déprime                                        | <input type="radio"/> | <input type="radio"/> | <input type="radio"/>        | <input type="radio"/> | <input type="radio"/> |
| (5) Je prends la vie comme elle vient et je fais au mieux    | <input type="radio"/> | <input type="radio"/> | <input type="radio"/>        | <input type="radio"/> | <input type="radio"/> |
| (6) Je me sens chanceux-se par rapport à la plupart des gens | <input type="radio"/> | <input type="radio"/> | <input type="radio"/>        | <input type="radio"/> | <input type="radio"/> |
| (7) En général, je vois plutôt le bon côté des choses        | <input type="radio"/> | <input type="radio"/> | <input type="radio"/>        | <input type="radio"/> | <input type="radio"/> |

---

---

**Situation financière**

|                                                                                  | Tout à fait d'accord  | D'accord              | Ni d'accord, ni pas d'accord | Pas d'accord          | Pas du tout d'accord  |
|----------------------------------------------------------------------------------|-----------------------|-----------------------|------------------------------|-----------------------|-----------------------|
| (8) Le coût de la vie par rapport à mes revenus réduit mon niveau de vie         | <input type="radio"/> | <input type="radio"/> | <input type="radio"/>        | <input type="radio"/> | <input type="radio"/> |
| (9) J'ai assez d'argent pour payer les factures du ménage                        | <input type="radio"/> | <input type="radio"/> | <input type="radio"/>        | <input type="radio"/> | <input type="radio"/> |
| (10) J'ai assez d'argent pour payer l'entretien de mon logement ou de mon ménage | <input type="radio"/> | <input type="radio"/> | <input type="radio"/>        | <input type="radio"/> | <input type="radio"/> |
| (11) J'ai l'argent nécessaire pour acheter ce dont j'ai envie                    | <input type="radio"/> | <input type="radio"/> | <input type="radio"/>        | <input type="radio"/> | <input type="radio"/> |
| (12) Je n'ai pas l'argent nécessaire pour faire ce qui me plairait               | <input type="radio"/> | <input type="radio"/> | <input type="radio"/>        | <input type="radio"/> | <input type="radio"/> |

---

---

### Condition physique

|                                                                                           | Tout à fait<br>d'accord | D'accord              | Ni d'accord, ni<br>pas d'accord | Pas<br>d'accord       | Pas du tout<br>d'accord |
|-------------------------------------------------------------------------------------------|-------------------------|-----------------------|---------------------------------|-----------------------|-------------------------|
| (13) Physiquement, j'ai beaucoup<br>d'énergie                                             | <input type="radio"/>   | <input type="radio"/> | <input type="radio"/>           | <input type="radio"/> | <input type="radio"/>   |
| (14) La douleur affecte mon bien<br>être                                                  | <input type="radio"/>   | <input type="radio"/> | <input type="radio"/>           | <input type="radio"/> | <input type="radio"/>   |
| (15) Mon état de santé<br>m'empêche de m'occuper de moi<br>ou de mon foyer                | <input type="radio"/>   | <input type="radio"/> | <input type="radio"/>           | <input type="radio"/> | <input type="radio"/>   |
| (16) J'ai des activités sociales et des<br>loisirs qui me plaisent                        | <input type="radio"/>   | <input type="radio"/> | <input type="radio"/>           | <input type="radio"/> | <input type="radio"/>   |
| (17) J'essaie de continuer à être<br>actif-ve                                             | <input type="radio"/>   | <input type="radio"/> | <input type="radio"/>           | <input type="radio"/> | <input type="radio"/>   |
| (18) Je poursuis des activités<br>bénévoles ou rémunérées qui<br>donnent un sens à ma vie | <input type="radio"/>   | <input type="radio"/> | <input type="radio"/>           | <input type="radio"/> | <input type="radio"/>   |
| (19) Je suis suffisamment en<br>bonne santé pour être<br>indépendant-e                    | <input type="radio"/>   | <input type="radio"/> | <input type="radio"/>           | <input type="radio"/> | <input type="radio"/>   |
| (20) J'éprouve du plaisir à ce que<br>je fais                                             | <input type="radio"/>   | <input type="radio"/> | <input type="radio"/>           | <input type="radio"/> | <input type="radio"/>   |
| (21) Je maîtrise bien les éléments<br>importants de ma vie                                | <input type="radio"/>   | <input type="radio"/> | <input type="radio"/>           | <input type="radio"/> | <input type="radio"/>   |

## Relations sociales

|                                                                                                      | Tout à fait d'accord  | D'accord              | Ni d'accord, ni pas d'accord | Pas d'accord          | Pas du tout d'accord  |
|------------------------------------------------------------------------------------------------------|-----------------------|-----------------------|------------------------------|-----------------------|-----------------------|
| (22) J'aimerais plus de compagnie ou de contacts avec d'autres personnes                             | <input type="radio"/> | <input type="radio"/> | <input type="radio"/>        | <input type="radio"/> | <input type="radio"/> |
| (23) J'aimerais être plus entouré-e pour apprécier la vie                                            | <input type="radio"/> | <input type="radio"/> | <input type="radio"/>        | <input type="radio"/> | <input type="radio"/> |
| (24) J'ai des responsabilités envers d'autres qui restreignent mes activités sociales ou mes loisirs | <input type="radio"/> | <input type="radio"/> | <input type="radio"/>        | <input type="radio"/> | <input type="radio"/> |

## Culture et religion

|                                                                                            | Tout à fait d'accord  | D'accord              | Ni d'accord, ni pas d'accord | Pas d'accord          | Pas du tout d'accord  |
|--------------------------------------------------------------------------------------------|-----------------------|-----------------------|------------------------------|-----------------------|-----------------------|
| (25) La religion, la foi ou la philosophie sont importantes pour ma qualité de vie         | <input type="radio"/> | <input type="radio"/> | <input type="radio"/>        | <input type="radio"/> | <input type="radio"/> |
| (26) Assister à des événements religieux ou culturels est important pour ma qualité de vie | <input type="radio"/> | <input type="radio"/> | <input type="radio"/>        | <input type="radio"/> | <input type="radio"/> |

## Domicile et voisinage

|                                                                                        | Tout à fait d'accord  | D'accord              | Ni d'accord, ni pas d'accord | Pas d'accord          | Pas du tout d'accord  |
|----------------------------------------------------------------------------------------|-----------------------|-----------------------|------------------------------|-----------------------|-----------------------|
| (27) Les infrastructures, les commerces et les services locaux sont généralement bons. | <input type="radio"/> | <input type="radio"/> | <input type="radio"/>        | <input type="radio"/> | <input type="radio"/> |
| (28) J'ai du plaisir à être chez moi                                                   | <input type="radio"/> | <input type="radio"/> | <input type="radio"/>        | <input type="radio"/> | <input type="radio"/> |
| (29) Je trouve mon voisinage sympathique                                               | <input type="radio"/> | <input type="radio"/> | <input type="radio"/>        | <input type="radio"/> | <input type="radio"/> |

## Contexte familial

|                                                                                                                                                | Tout à fait d'accord | D'accord | Ni d'accord, ni pas d'accord | Pas d'accord | Pas du tout d'accord |
|------------------------------------------------------------------------------------------------------------------------------------------------|----------------------|----------|------------------------------|--------------|----------------------|
| (31) Ma famille, mes amis ou mes voisins m'aideraient en cas de besoin                                                                         | O                    | O        | O                            | O            | O                    |
| (31) J'ai quelqu'un qui me donne de l'amour et de l'affection                                                                                  | O                    | O        | O                            | O            | O                    |
| (32) Mes enfants sont proches de moi, c'est important (Si pas d'enfants, proposez neveux ou nièces ou autres personnes plus jeunes et proches) | O                    | O        | O                            | O            | O                    |

## Autres

|                                                                                                                                | Tout à fait d'accord | D'accord | Ni d'accord, ni pas d'accord | Pas d'accord | Pas du tout d'accord |
|--------------------------------------------------------------------------------------------------------------------------------|----------------------|----------|------------------------------|--------------|----------------------|
| (33) Je suis suffisamment en bonne santé pour sortir de chez moi                                                               | O                    | O        | O                            | O            | O                    |
| (34) Je me sens en sécurité où je vis                                                                                          | O                    | O        | O                            | O            | O                    |
| (35) Si mon état de santé devait limiter mes activités sociales et mes loisirs, je compenserais en trouvant d'autres activités | O                    | O        | O                            | O            | O                    |
